# Supplementary material for: The rice bran peptide KF-8 extends the lifespan and improves the healthspan of Caenorhabditis elegans via skn-1 and daf-16
Source: Royal Society of Chemistry journal article supplement (doi:10.1039/d1fo03718h), 2022-01-01
Supplement: d1fo03718h1.pdf [file d1fo03718h1.pdf]

### Detection of KF-8 Optical Rotation

Different batches of KF-8 solutions with a final concentration of 0.03 mM and 0.1 mM were prepared, and the optical rotation of the solution was measured using a polarimeter (Shanghai INESA Physico-Optical Instrument Co.,Ltd., SGW®-2) at 0 h and 24 h at 4°C, respectively. The polarimeter was calibrated using ddH<sub>2</sub>O. Different concentrations of KF-8 solutions were poured into 100 mm test tubes and then placed in a polarimeter to measure their optical rotations. Different concentrations of KF-8 were independently replicated 6 times for optical rotation, respectively.

| Product batch    | Group        | Time | 0.03 mM KF-8      |
|------------------|--------------|------|-------------------|
| 04010016068-2017 | 0.03 mM KF-8 | 0 h  | 0.0115±0.001225   |
|                  |              | 24 h | 0.011±0.001035    |
|                  | 0.1 mM KF-8  | 0 h  | 0.011333±0.001033 |
|                  |              | 24 h | 0.011±0.001095    |
| 04010016068-2019 | 0.03 mM KF-8 | 0 h  | 0.01              |
|                  |              | 24 h | 0.012±0.0015119   |
|                  | 0.1 mM KF-8  | 0 h  | 0.01              |
|                  |              | 24 h | 0.011±0.001025    |

### KF-8 Stability

The optical rotation of KF-8 was measured with a polarimeter, and it was found that its optical rotation of KF-8 was close to 0, whatever the KF-8 product batch is, indicating that the peptide may be a mesomer. Furthermore, we found no significant difference in optical rotation of KF-8 solution at 0 h and 24 h at 4°C, indicating that KF-8 has excellent stability during general experimental conditions.
