# Supplementary material for: The rice bran peptide KF-8 extends the lifespan and improves the healthspan of Caenorhabditis elegans via skn-1 and daf-16
Source: Royal Society of Chemistry journal article supplement (doi:10.1039/d1fo03718h), 2022-01-01
Supplement: d1fo03718h2.pdf [file d1fo03718h2.pdf]

### Characterization of the secondary structure of peptides

FT-IR is a common method to characterize the secondary structure of proteins or peptides, which is mainly located in the amide I region ( $1600\text{-}1700\text{ cm}^{-1}$ )<sup>1</sup>. Figure 1 shows the spectrum of Amide I before and after the reaction between KF-8 and  $\text{H}_2\text{O}_2$ . 13 main bands related to KF-8 were observed in the amide I area. And Table 1 showed the secondary structural percentage before and after the reaction of KF-8 with  $\text{H}_2\text{O}_2$  assigned to amide I region. The secondary structure before and after the reaction of KF-8 with  $\text{H}_2\text{O}_2$  is mainly  $\beta$ -sheet structure. After adding  $\text{H}_2\text{O}_2$ , the content of  $\beta$ -sheet structure of KF-8 changed from 48.75% to 46.6%. The content of random coil structure changed from 12.58% to 11.18%. The content of  $\alpha$ -helix and  $\beta$ -turn structure changed from 16.27% to 16.07% and from 18.52% to 17.76%, respectively. In the secondary structure of proteins,  $\beta$ -sheet is a common regular secondary structure<sup>2</sup>. It can play a role in stabilizing the structure<sup>3</sup>. The results show that the secondary structure of KF-8 is relatively stable and will not react with  $\text{H}_2\text{O}_2$ .

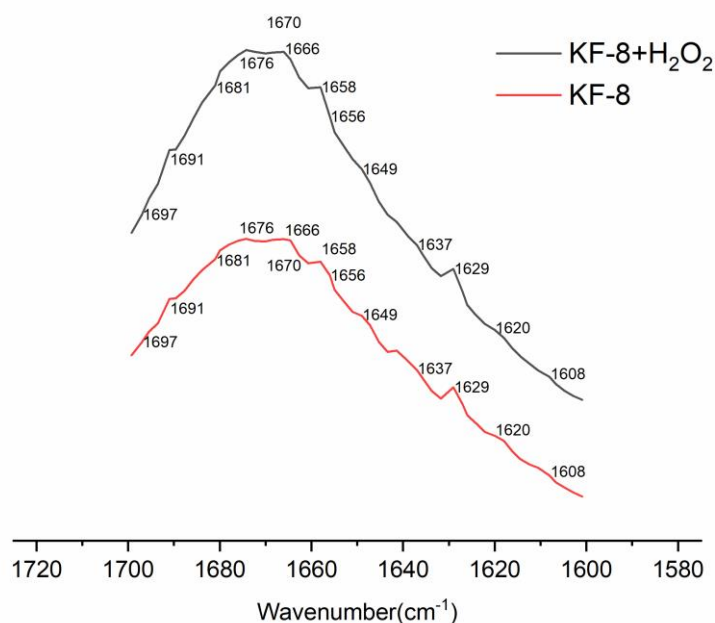

Figure 1 Deconvoluted FTIR spectra before and after the reaction of KF-8 with  $\text{H}_2\text{O}_2$

Table 1 Secondary structure contents before and after the reaction of KF-8 with H<sub>2</sub>O<sub>2</sub>

| Structure                      |                                    | $\beta$ -sheet          | Random coil             | $\alpha$ -helix         | $\beta$ -turn           |
|--------------------------------|------------------------------------|-------------------------|-------------------------|-------------------------|-------------------------|
| Wavenumber (cm <sup>-1</sup> ) |                                    | 1618-1640               | 1640-1650               | 1650-1660               | 1660-1670               |
|                                |                                    | 1670-1690               |                         |                         |                         |
| Structure                      | KF-8                               | 48.75±1.27 <sup>a</sup> | 12.58±0.31 <sup>a</sup> | 16.27±0.48 <sup>a</sup> | 18.52±0.48 <sup>a</sup> |
| percentage(%)                  | KF-8+H <sub>2</sub> O <sub>2</sub> | 46.60±0.06 <sup>a</sup> | 11.18±0.01 <sup>b</sup> | 16.07±0.05 <sup>a</sup> | 17.76±0.04 <sup>a</sup> |

Different letters in the same column indicate significant differences in P < 0.05.

1. P. I. Haris and D. Chapman, The conformational analysis of peptides using Fourier transform IR spectroscopy, *Biopolymers*, 1995, **37**, 251-263.
2. Z. H. Song, X. Chen, X. R. You, K. Q. Huang, A. Dhinakar, Z. P. Gu and J. Wu, Self-assembly of peptide amphiphiles for drug delivery: the role of peptide primary and secondary structures, *Biomater. Sci.*, 2017, **5**, 2369-2380.
3. C. L. Ge, H. Ye, F. Wu, J. L. Zhu, Z. Y. Song, Y. Liu and L. C. Yin, Biological applications of water-soluble polypeptides with ordered secondary structures, *J. Mat. Chem. B*, 2020, **8**, 6530-6547.
